# Supplementary figures and images for: Uniparental Inheritance and Recombination as Strategies to Avoid Competition and Combat Muller’s Ratchet among Mitochondria in Natural Populations of the Fungus Amanita phalloides
Source: MDPI journal article supplement (doi:10.3390/jof9040476), 2023-04-15

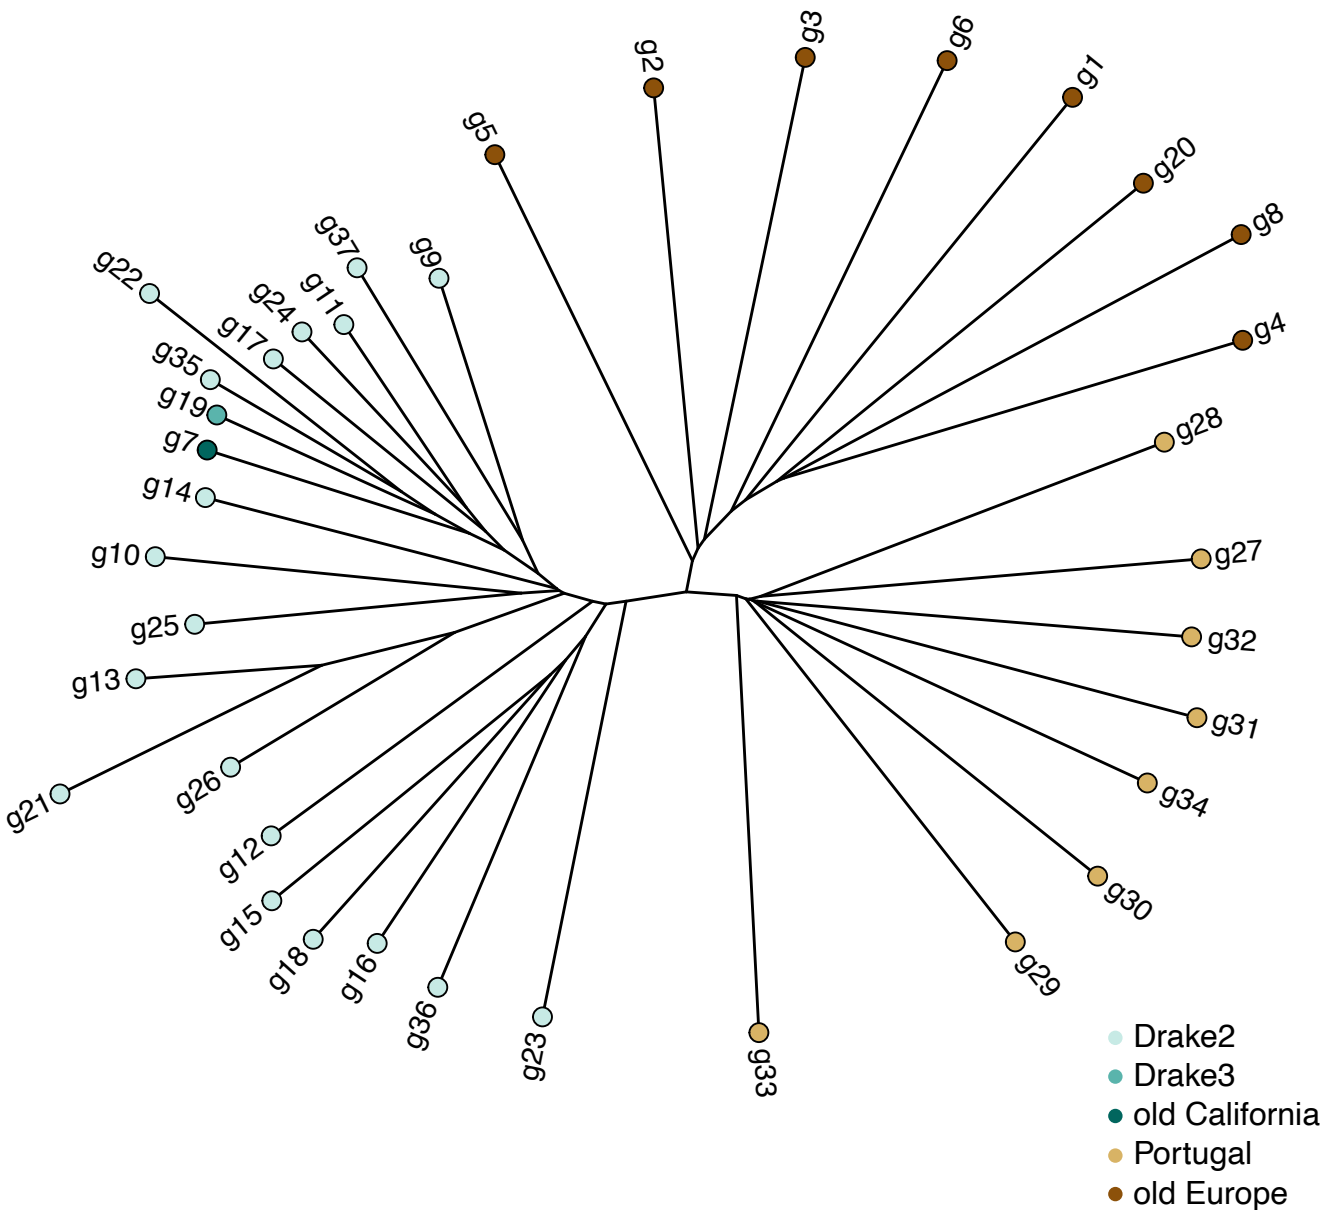

Supplement: s1 [file s1]

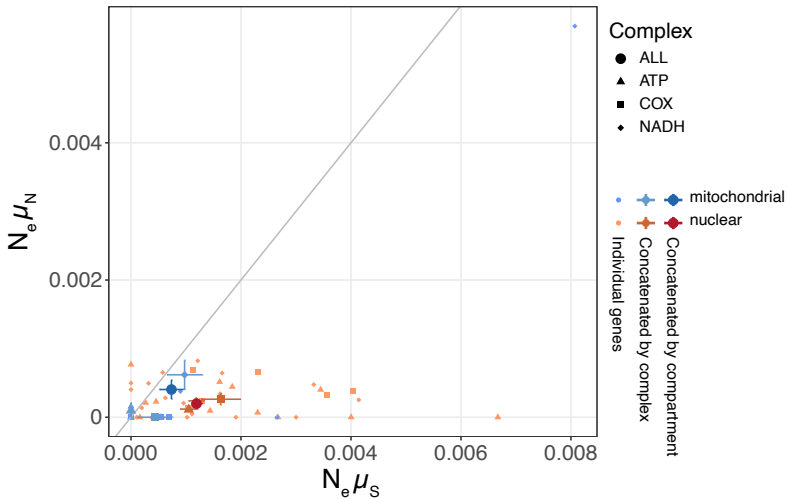

Supplement: s1 [file s1]
